# Supplementary material
Source: Elsevier journal article supplement (https://www.sciencedirect.com/science/article/pii/S2013251416301006)
Supplement: mmc1 [file S2013251416301006:mmc1.docx]

**SUPPLEMENTARY MATERIAL**

**Supplementary table 1.** **A** **multivariate analysis of the association between different cardiovascular risk factors and abnormal UACR.**

| **Variable** | **OR (95% CI)** | **p** |
| --- | --- | --- |
| Age | 1.04 (1.02–1.07) | < 0.01 |
| Obesity | 1.12 (0.69–1.82) | NS |
| Hypertension | 3.44 (2.12–5.57) | < 0.01 |
| Dyslipidaemia | 2.13 (1.33–3.40) | < 0.01 |
| Pathological eGFR | 1.93 (0.95–3.92) | NS |
| NLR (per unit) | 1.4 (1.13–1.75) | < 0.01 |
| HOMA-IR | 1.11 (1.04–1.20) | < 0.01 |

eGFR: Estimated Glomerular Filtration Rate; HOMA-IR: Homeostatic Model Assessment of Insulin Resistance; NLR: Neutrophil/Lymphocyte Ratio; OR: Odds Ratio.

**Supplementary table 2. A multivariate analysis of the association between different cardiovascular risk factors, NLR and altered UACR in a subgroup of 439 patients.**

| **Variable** | **OR (95% CI)** | **p** |
| --- | --- | --- |
| Age | 1 (0.97–1.04) | NS |
| Obesity | 1.17 (0.53–2.61) | NS |
| Hypertension | 1.94 (0.84–4.50) | NS |
| Diabetes mellitus | 4.37 (1.78–10.77) | < 0.01 |
| Dyslipidaemia | 3.08 (1.04–9.18) | < 0.05 |
| Pathological eGFR | 7.02 (1.99–24.77) | < 0.01 |
| NLR (per unit) | 1.6 (1.14–2.25) | < 0.01 |

eGFR: Estimated Glomerular Filtration Rate; NLR: Neutrophil/Lymphocyte Ratio; OR: Odds Ratio.

**Supplementary table 3.** **A multivariate analysis of the association between different cardiovascular risk factors, CRP and abnormal UACR in a subgroup of 439 patients.**

| **Variable** | **OR (95% CI)** | **p** |
| --- | --- | --- |
| Age | 1 (0.97–1.04) | NS |
| Obesity | 1.19 (0.55–2.62) | NS |
| Hypertension | 2.21 (0.98–5.01) | NS |
| Diabetes mellitus | 4.07 (1.69–9.79) | < 0.05 |
| Dyslipidaemia | 2.95 (1.00–8.76) | < 0.05 |
| Pathological eGFR | 6.83 (1.77–23.06) | < 0.01 |
| CRP | 0.94 (0.56–1.67) | NS |

eGFR: Estimated Glomerular Filtration Rate; CRP: C-Reactive Protein; OR: Odds Ratio.
